# Supplementary material
Source: bioRxiv or medRxiv preprint supplement (http://medrxiv.stage.highwire.org/highwire/filestream/91939/field_highwire_adjunct_files/0/2020.07.31.20166223-1.pdf)
Supplement: Supplementary file [file 2020.07.31.20166223-1.pdf]

# A survey-based women's empowerment index to be used in all low- and middle-income country surveys: the SWPER goes global

## Supplementary material

### How to calculate the SWPER for a specific survey

The equation used to estimate individual standardized scores for each of the principal component analysis (PCA)  $j$  components is given by:

$$S_{ij} = \frac{[\lambda_{1j}(x_{1i} - \bar{x}_1)] + [(\lambda_{2j}(x_{2i} - \bar{x}_2))] + \dots + [\lambda_{14j}(x_{14i} - \bar{x}_{14})]}{\sigma_j} \quad (1)$$

where  $S_{ij}$  are the individual standardized scores for individual  $i$  and component  $j$ ;  $x_{1j}, \dots, x_{14j}$  are the individual values for items  $x_1$ - $x_{14}$  included in the PCA analyses;  $\sigma_j$  are the standard deviations of the predicted scores of each component  $j$ . The weight given to each of the 15 items in each component  $j$  is defined as:

$$\lambda_{vj} = \frac{\varphi_{vj}}{\sigma_v} \quad (2)$$

Where  $\varphi_{vj}$  is the PCA loading for each of the items  $v$  in each domain  $j$  and  $\sigma_v$  is the standard deviation of each item  $v$  in the combined dataset.

By using simple algebra, we can simplify the equation above to:

$$S_{ij} = \frac{[-(\sum_{v=1}^{14} \lambda_{vj} \bar{x}_v) + \sum_{v=1}^{14} (\lambda_{vj} x_{vi})]}{\sigma_j} \quad (3)$$

Please, follow the next steps to calculate the standardized individual SWPER scores for any low- and middle-country (LMIC) of your interest<sup>1</sup>:

#### 1. Recode items

The first step is to recode the items as it is shown in Table 2, presented in the article.

##### 1.1. Imputation of woman's age at first birth

We used single hotdeck imputation to impute the age at first birth for nulliparous women, clustering women according to their age at first cohabitation. In many countries the number of women that had the first cohabitation later in life was very small, so we generated a new variable of age at first cohabitation to use in the imputation where the maximum age was set at 33+ years.

#### 2. Calculate the individual scores

Using the equations below, it is possible to estimate the scores for the three SWPER domains:

$$\begin{aligned} Score_{Attitude\ to\ violence_i} &= (-1.202) + \sum_{v=1}^{14} (\lambda_{v1} x_{vi}) \\ Score_{Social\ independence_i} &= (-5.661) + \sum_{v=1}^{14} (\lambda_{v2} x_{vi}) \\ Score_{Decision-making_i} &= (-0.168) + \sum_{v=1}^{14} (\lambda_{v3} x_{vi}) \end{aligned}$$

Where  $x_{vi}$  is the value of items  $v$  for each individual  $i$  and  $\lambda_{v1} - \lambda_{v3}$  are the item weights, that can be found in Table S1.

<sup>1</sup> A Stata do-file with all procedures required for the calculation of the SWPER Index scores is available from the Dropbox link <<https://www.dropbox.com/sh/cw6e2th24l4ausa/AAC792VQx3CL7CuIdLwTxKiWa?dl=0>>.

### 3. Standardize the calculated SWPER scores

The last step in the calculation of the individual scores is their standardization. You can decide whether to (1) use the SWPER global mean and standard deviations to standardize the scores (zero score represents the average LMICs mean); or (2) use a specific region mean and standard deviation, then having an empowerment measure that is standardized for that specific region (zero value represents the average empowerment level of that specific region). To standardize the SWPER score the procedure is simple. One should just subtract the mean score for the region chosen and divide the result by the respective standard deviation (values provided in Table S2, below):

$$\text{Std Score}_{\text{Attitude to violence}_i} = \frac{(\text{Score}_{\text{Attitude to violence}_i}) - (\text{mean})}{\text{standard deviation}}$$

$$\text{Std Score}_{\text{Social independence}_i} = \frac{(\text{Score}_{\text{Social independence}_i}) - (\text{mean})}{\text{standard deviation}}$$

$$\text{Std Score}_{\text{Decision-making}_i} = \frac{(\text{Score}_{\text{Decision-making}_i}) - (\text{mean})}{\text{standard deviation}}$$

**Table S1. Item weights used in the equations for estimating individual scores for each domain of the SWPER Index.**

| Item (v)                                                             | $\lambda_{v1}$<br>Attitude to violence | $\lambda_{v2}$<br>Social independence | $\lambda_{v3}$<br>Decision-making |
|----------------------------------------------------------------------|----------------------------------------|---------------------------------------|-----------------------------------|
| 1. Beating not justified if wife goes out without telling husband    | 0.508                                  | -0.012                                | -0.003                            |
| 2. Beating not justified if wife neglects the children               | 0.508                                  | -0.026                                | -0.040                            |
| 3. Beating not justified if wife argues with husband                 | 0.526                                  | 0.001                                 | 0.007                             |
| 4. Beating not justified if wife refuses to have sex with husband    | 0.538                                  | 0.001                                 | 0.028                             |
| 5. Beating not justified if wife burns the food                      | 0.588                                  | -0.015                                | -0.020                            |
| 6. Frequency of reading newspaper or magazine                        | 0.083                                  | 0.422                                 | 0.121                             |
| 7. Woman education                                                   | 0.016                                  | 0.081                                 | 0.022                             |
| 8. Age of respondent at cohabitation                                 | -0.006                                 | 0.133                                 | -0.012                            |
| 9. Age of respondent at first birth                                  | -0.010                                 | 0.139                                 | -0.016                            |
| 10. Age difference: woman's minus husband's age                      | 0.001                                  | 0.031                                 | 0.013                             |
| 11. Education difference: woman's minus husband's years of schooling | 0.002                                  | 0.054                                 | 0.001                             |
| 12. Who usually decides on respondent's health care                  | 0.001                                  | -0.004                                | 0.599                             |
| 13. Who usually decides on large household purchases                 | -0.017                                 | -0.022                                | 0.601                             |
| 14. Who usually decides on visits to family or relatives             | 0.002                                  | -0.034                                | 0.619                             |

**Table S2. Mean and standard deviation for the standardization of the SWPER scores.**

| Region                     | Attitude to violence |           | Social Independence |           | Decision-making |           |
|----------------------------|----------------------|-----------|---------------------|-----------|-----------------|-----------|
|                            | Mean                 | Std. dev. | Mean                | Std. dev. | Mean            | Std. dev. |
| South Asia                 | -0.138               | 1.804     | -0.121              | 1.452     | -0.097          | 1.546     |
| East Asia & Pacific        | 0.238                | 1.563     | 0.757               | 1.550     | 0.792           | 0.950     |
| Europe and Central Asia    | 0.256                | 1.701     | 1.286               | 1.169     | 0.619           | 1.296     |
| Middle East & North Africa | -0.167               | 1.923     | 0.371               | 1.549     | 0.014           | 1.449     |
| West & Central Africa      | -0.601               | 2.030     | -0.683              | 1.346     | -0.913          | 1.562     |
| Eastern & Southern Africa  | 0.094                | 1.745     | -0.142              | 1.350     | 0.246           | 1.283     |
| Latin America & Caribbean  | 1.084                | 0.852     | 0.460               | 1.546     | 0.674           | 1.049     |
| SWPER Global               | 0.000                | 1.811     | 0.000               | 1.526     | 0.000           | 1.502     |

**Table S3. Cut-offs used to categorize the SWPER domains into low, medium and high empowerment levels.**

|                    | Attitude to violence  | Social independence   | Decision-making       |
|--------------------|-----------------------|-----------------------|-----------------------|
| Low empowerment    | $\leq -0.700$         | $\leq -0.559$         | $\leq -1.000$         |
| Medium empowerment | $> -0.700 \leq 0.400$ | $> -0.559 \leq 0.293$ | $> -1.000 \leq 0.600$ |
| High empowerment   | $> 0.400$             | $> 0.293$             | $> 0.600$             |

**Figure S1. Distribution of the attitude to violence, social independence and decision making SWPER scores with the red lines indicating the cut-offs defined to categorize the empowerment levels in three groups (low, medium and high empowerment).**

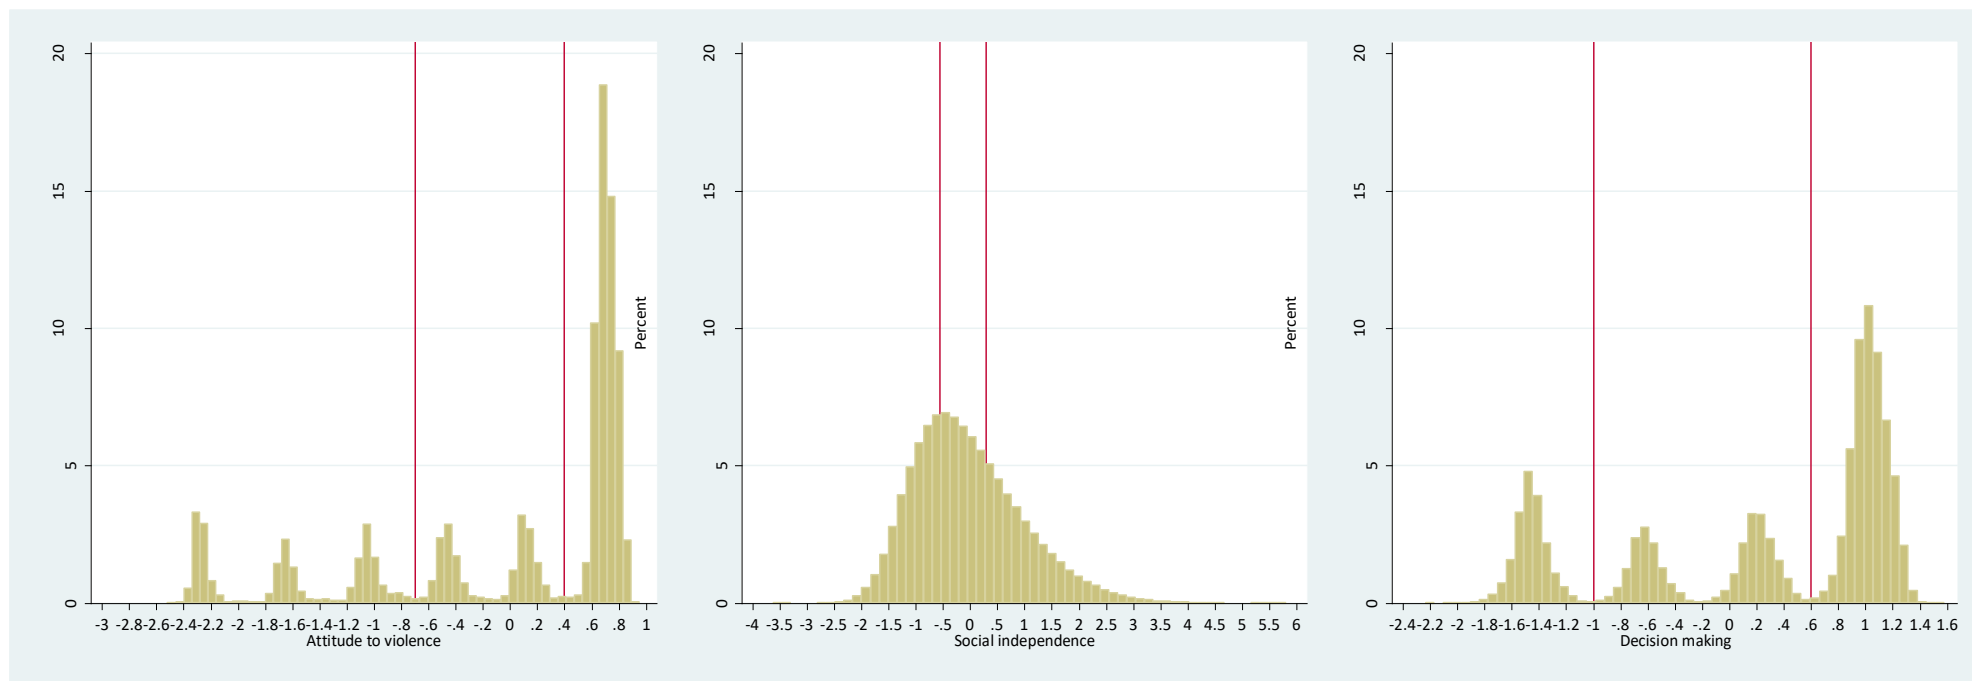

**Table S4. Proportion of women aged 15-49 who are married or in a union for each country analysed.**

| Country                               | Year | Proportion of women married/in union |
|---------------------------------------|------|--------------------------------------|
| <b>South Asia</b>                     |      |                                      |
| Afghanistan                           | 2015 | 68.9*                                |
| Bangladesh                            | 2014 | 81.6*                                |
| India                                 | 2015 | 73.1                                 |
| Maldives                              | 2009 | 68.6                                 |
| Nepal                                 | 2016 | 76.8                                 |
| Pakistan                              | 2012 | 63.7*                                |
| <b>East Asia &amp; the Pacific</b>    |      |                                      |
| Cambodia                              | 2014 | 67.7                                 |
| Indonesia                             | 2012 | 73.4                                 |
| Myanmar                               | 2015 | 60.2                                 |
| Philippines                           | 2017 | 59.9                                 |
| Timor-Leste                           | 2016 | 61.1                                 |
| <b>Europe &amp; Central Asia</b>      |      |                                      |
| Albania                               | 2008 | 65.9                                 |
| Armenia                               | 2015 | 63.7                                 |
| Azerbaijan                            | 2006 | 62.4                                 |
| Kyrgyzstan                            | 2012 | 64.0                                 |
| Moldova                               | 2005 | 66.4                                 |
| Tajikistan                            | 2012 | 67.4                                 |
| Ukraine                               | 2007 | 60.2                                 |
| <b>Middle East &amp; North Africa</b> |      |                                      |
| Egypt                                 | 2014 | 69.8*                                |
| Morocco                               | 2003 | 52.3                                 |
| <b>West &amp; Central Africa</b>      |      |                                      |
| Benin                                 | 2011 | 70.4                                 |
| Burkina Faso                          | 2010 | 79.4                                 |
| Cameroon                              | 2011 | 63.5                                 |
| Chad                                  | 2014 | 74.8                                 |
| Congo DR                              | 2013 | 64.2                                 |
| Cote d'Ivoire                         | 2011 | 62.7                                 |
| Gabon                                 | 2012 | 53.1                                 |
| Gambia                                | 2013 | 66.4                                 |
| Ghana                                 | 2014 | 56.6                                 |
| Guinea                                | 2012 | 73.6                                 |
| Liberia                               | 2013 | 58.3                                 |
| Mali                                  | 2012 | 84.6                                 |
| Niger                                 | 2012 | 88.5                                 |
| Nigeria                               | 2013 | 71.5                                 |
| Sao Tome & Principe                   | 2008 | 65.7                                 |
| Senegal                               | 2017 | 64.9                                 |
| Sierra Leone                          | 2013 | 65.5                                 |
| Togo                                  | 2013 | 66.3                                 |
| <b>Eastern &amp; Southern Africa</b>  |      |                                      |
| Angola                                | 2015 | 55.3                                 |
| Burundi                               | 2016 | 56.6                                 |
| Comoros                               | 2012 | 61.2                                 |
| Eswatini                              | 2006 | 41.3                                 |
| Ethiopia                              | 2016 | 65.2                                 |
| Kenya                                 | 2014 | 59.7                                 |
| Lesotho                               | 2014 | 54.6                                 |
| Madagascar                            | 2008 | 69.3                                 |
| Malawi                                | 2015 | 65.7                                 |
| Mozambique                            | 2011 | 67.9                                 |
| Namibia                               | 2013 | 34.0                                 |
| Rwanda                                | 2014 | 51.7                                 |
| Tanzania                              | 2015 | 61.9                                 |
| Uganda                                | 2016 | 60.6                                 |
| Zambia                                | 2013 | 60.1                                 |
| Zimbabwe                              | 2015 | 61.8                                 |
| <b>Latin America &amp; Caribbean</b>  |      |                                      |
| Bolivia                               | 2008 | 60.0                                 |
| Dominican Republic                    | 2013 | 54.0                                 |
| Guatemala                             | 2014 | 58.0                                 |
| Guyana                                | 2009 | 58.4                                 |
| Haiti                                 | 2016 | 51.5                                 |
| Honduras                              | 2011 | 56.5                                 |
| Nicaragua                             | 2001 | 56.8                                 |
| Peru                                  | 2016 | 57.5                                 |

Note: \*Data not available from DHS as these surveys only included ever-married women. Information from United Nations, Department of Economic and Social Affairs, Population Division (2020). Estimates and Projections of Women of Reproductive Age Who Are Married or in a Union: 2020 Revision. New York: United Nations.

**Table S5. Coverage of low- and middle-income countries included in the development of the SWPER global.**

| <b>Country</b>                              | <b>Included</b> | <b>Not included</b> |
|---------------------------------------------|-----------------|---------------------|
| <b>All (48%)</b>                            |                 |                     |
| <b>South Asia (75%)</b>                     |                 |                     |
| Afghanistan                                 | X               |                     |
| Bangladesh                                  | X               |                     |
| Bhutan                                      |                 | X                   |
| India                                       | X               |                     |
| Maldives                                    | X               |                     |
| Nepal                                       | X               |                     |
| Pakistan                                    | X               |                     |
| Sri Lanka                                   |                 | X                   |
| <b>East Asia &amp; the Pacific (33%)</b>    |                 |                     |
| Cambodia                                    | X               |                     |
| China                                       |                 | X                   |
| Indonesia                                   | X               |                     |
| Korea DPR                                   |                 | X                   |
| Lao                                         |                 | X                   |
| Mongolia                                    |                 | X                   |
| Myanmar                                     | X               |                     |
| Papua New Guinea                            |                 | X                   |
| Philippines                                 | X               |                     |
| Samoa                                       |                 | X                   |
| Solomon Islands                             |                 | X                   |
| Thailand                                    |                 | X                   |
| Timor-Leste                                 | X               |                     |
| Vanuatu                                     |                 | X                   |
| Vietnam                                     |                 | X                   |
| <b>Europe &amp; Central Asia (37%)</b>      |                 |                     |
| Albania                                     | X               |                     |
| Armenia                                     | X               |                     |
| Azerbaijan                                  | X               |                     |
| Belarus                                     |                 | X                   |
| Bosnia and Herzegovina                      |                 | X                   |
| Georgia                                     |                 | X                   |
| Kazakhstan                                  |                 | X                   |
| Kosovo                                      |                 | X                   |
| Kyrgyzstan                                  | X               |                     |
| Macedonia                                   |                 | X                   |
| Moldova                                     | X               |                     |
| Montenegro                                  |                 | X                   |
| Serbia                                      |                 | X                   |
| Tajikistan                                  | X               |                     |
| Turkey                                      |                 | X                   |
| Turkmenistan                                |                 | X                   |
| Ukraine                                     | X               |                     |
| Uzbekistan                                  |                 | X                   |
| Yugoslavia                                  |                 | X                   |
| <b>Middle East &amp; North Africa (14%)</b> |                 |                     |
| Algeria                                     |                 | X                   |
| Djibouti                                    |                 | X                   |
| Egypt                                       | X               |                     |
| Iraq                                        |                 | X                   |
| Jordan                                      |                 | X                   |
| Lebanon                                     |                 | X                   |
| Morocco                                     | X               |                     |
| Oman                                        |                 | X                   |
| Qatar                                       |                 | X                   |
| State of Palestine                          |                 | X                   |
| Sudan                                       |                 | X                   |
| Syria                                       |                 | X                   |
| Tunisia                                     |                 | X                   |
| Yemen                                       |                 | X                   |
| <b>West &amp; Central Africa (72%)</b>      |                 |                     |
| Benin                                       | X               |                     |
| Burkina Faso                                | X               |                     |
| CAR                                         |                 | X                   |
| Cameroon                                    | X               |                     |
| Cape Verde                                  |                 | X                   |
| Chad                                        | X               |                     |
| Congo Brazzaville                           |                 | X                   |
| Congo DR                                    | X               |                     |
| Cote d'Ivoire                               | X               |                     |
| Equatorial Guinea                           |                 | X                   |
| Gabon                                       | X               |                     |
| Gambia                                      | X               |                     |

|                                            |   |   |
|--------------------------------------------|---|---|
| Ghana                                      | X |   |
| Guinea                                     | X |   |
| Guinea Bissau                              |   | X |
| Liberia                                    | X |   |
| Mali                                       | X |   |
| Mauritania                                 |   | X |
| Niger                                      | X |   |
| Nigeria                                    | X |   |
| Sao Tome & Principe                        | X |   |
| Senegal                                    | X |   |
| Sierra Leone                               | X |   |
| Togo                                       | X |   |
| Zaire                                      |   | X |
| <b>Eastern &amp; Southern Africa (76%)</b> |   |   |
| Angola                                     | X |   |
| Botswana                                   |   | X |
| Burundi                                    | X |   |
| Comoros                                    | X |   |
| Eritrea                                    |   | X |
| Eswatini                                   | X |   |
| Ethiopia                                   | X |   |
| Kenya                                      | X |   |
| Lesotho                                    | X |   |
| Madagascar                                 | X |   |
| Malawi                                     | X |   |
| Mozambique                                 | X |   |
| Namibia                                    | X |   |
| Rwanda                                     | X |   |
| Somalia                                    |   | X |
| South Africa                               |   | X |
| South Sudan                                |   | X |
| Tanzania                                   | X |   |
| Uganda                                     | X |   |
| Zambia                                     | X |   |
| Zimbabwe                                   | X |   |
| <b>Latin America &amp; Caribbean (30%)</b> |   |   |
| Argentina                                  |   | X |
| Barbados                                   |   | X |
| Belize                                     |   | X |
| Bolivia                                    | X |   |
| Brazil                                     |   | X |
| Colombia                                   |   | X |
| Costa Rica                                 |   | X |
| Cuba                                       |   | X |
| Dominican Republic                         | X |   |
| Ecuador                                    |   | X |
| El Salvador                                |   | X |
| Guatemala                                  | X |   |
| Guyana                                     | X |   |
| Haiti                                      | X |   |
| Honduras                                   | X |   |
| Jamaica                                    |   | X |
| Mexico                                     |   | X |
| Nicaragua                                  | X |   |
| Panama                                     |   | X |
| Paraguay                                   |   | X |
| Peru                                       | X |   |
| Puerto Rico                                |   | X |
| St Lucia                                   |   | X |
| Suriname                                   |   | X |
| Trinidad and Tobago                        |   | X |
| Uruguay                                    |   | X |
| Venezuela                                  |   | X |
